# Supplementary material
Source: Springer Nature journal article supplement (https://www.springermedizin.de/resource/supplementary/13058_2013_3279_MOESM7_ESM.pdf/9703854)

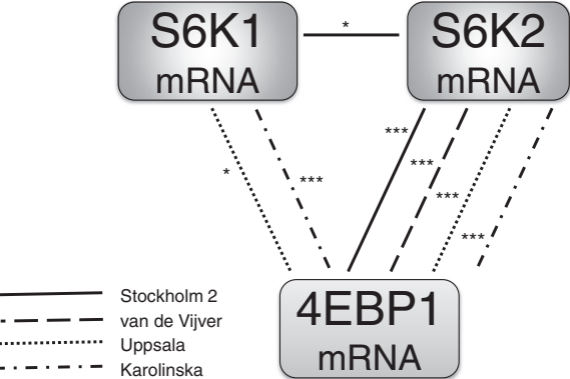

\*p<0.05, \*\*p<0.01, \*\*\*p<0.001

Supplement: MOESM7 [file 9703854]
